# Supplementary material
Source: PubMed Central journal article supplement (PMC5799817)
Supplement: cr2017158x2.pdf [file cr2017158x2.pdf]

## Supplementary information, Figure S2

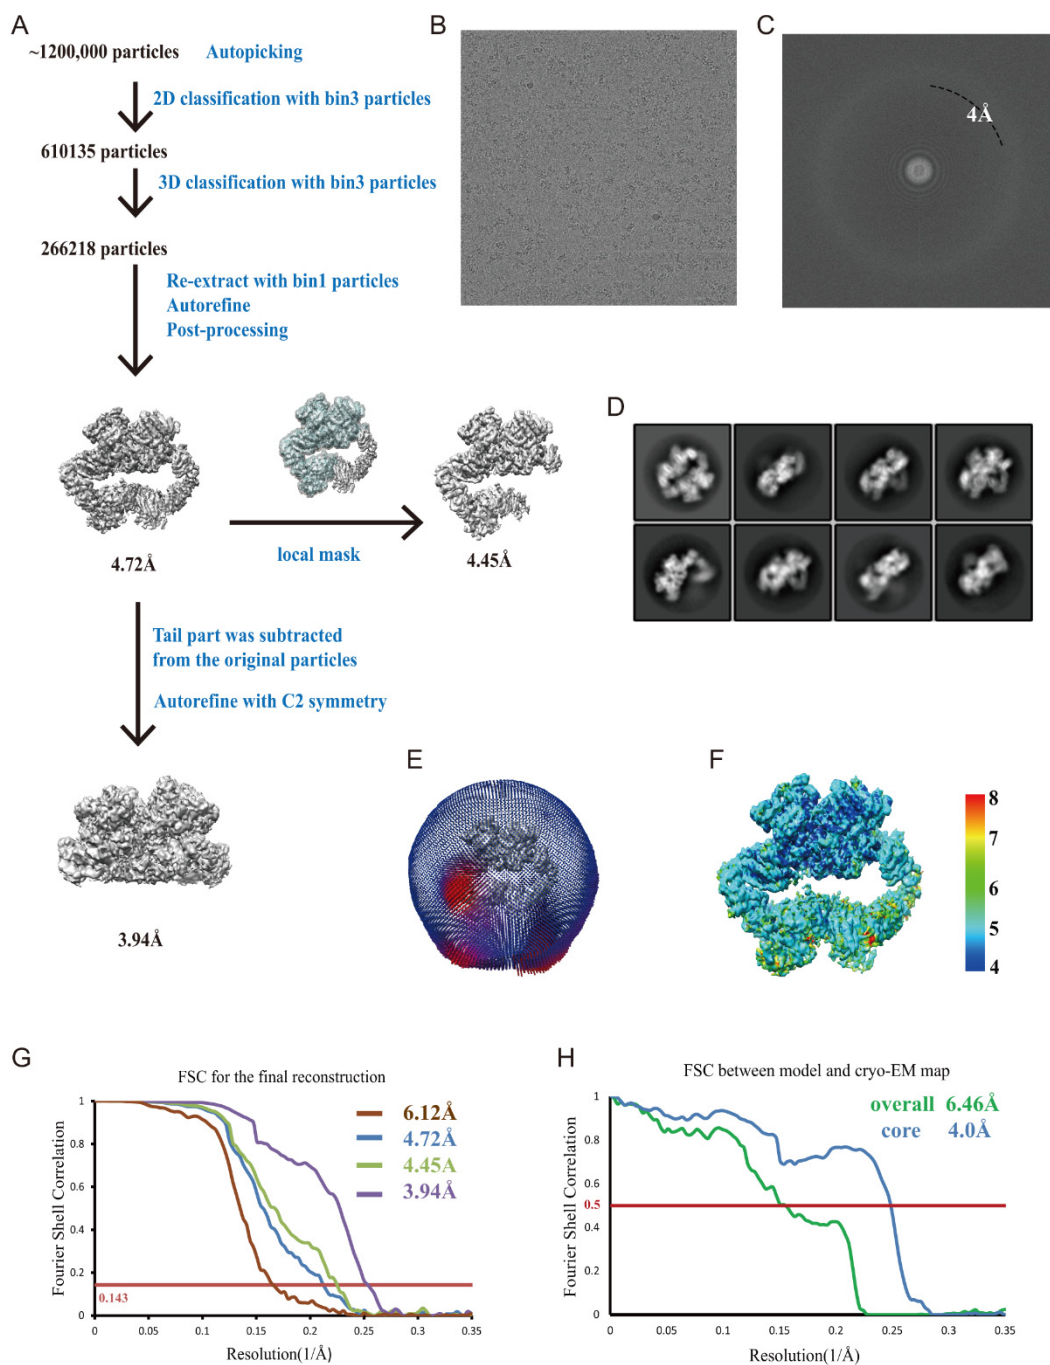

**Figure S2 Cryo-EM structure determination of ATR-ATRIP.** (A) Flow-chart of cryo-EM data processing. (B, C) Representative raw micrograph of cryo-EM ATR-ATRIP (B) and its Fourier transforms (C). (D) Representative 2D class average of cryo-EM ATR-ATRIP particles. (E) Angular distribution of cryo-EM ATR-ATRIP used for

final structural refinement. (F) Local resolution map of ATR-ATRIP calculated by ResMap. (G-H) FSC curves for the final 3D density map and the FSC between model and cryo-EM map.
