# Supplementary material
Source: PubMed Central journal article supplement (PMC5799817)
Supplement: cr2017158x6.pdf [file cr2017158x6.pdf]

## Supplementary information, Figure S6

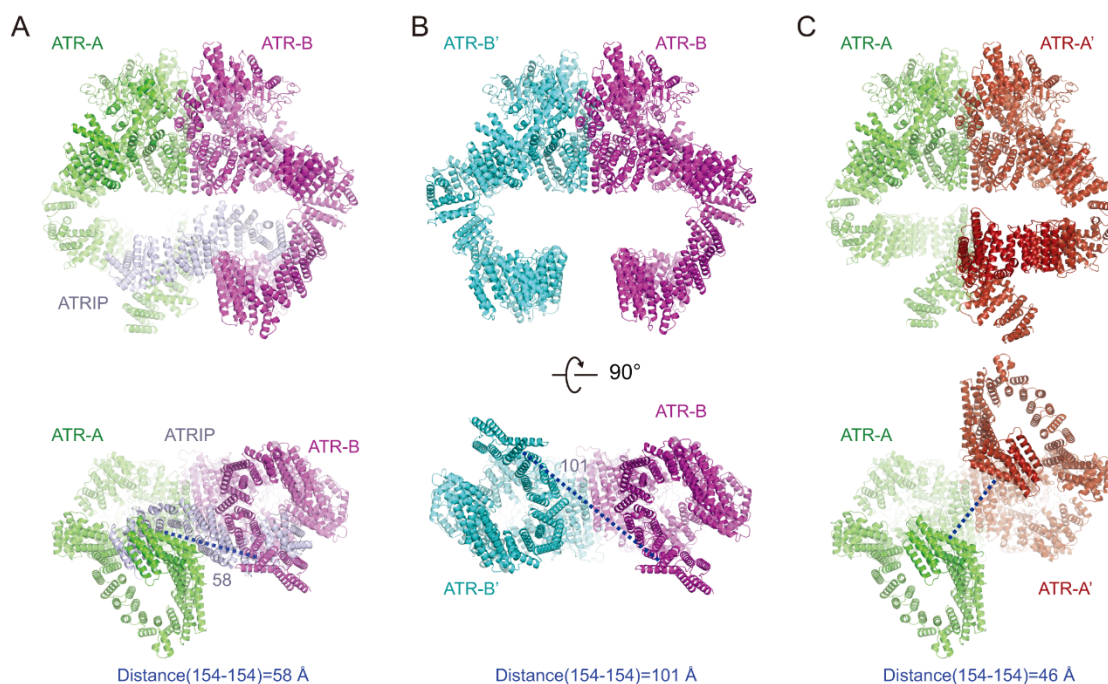

**Figure S6 Two ATR monomers for the ATR-ATRIP complex formation.** (A)

Ribbon representations of the ATR-ATRIP complex in two different views. ATRIP is omitted in the lower panel. The distance between the two ATR-ATRIP interfaces at the N-termini of ATR is indicated. Residue A154 of ATR (Number in the PDB) at the interface serves as a representative for the distance measurement. (B, C) ATR-dimer models when the two ATR monomers adopt B form (B) or A form (C), respectively. ATR-A' and ATR-B' represents an ATR monomer in ATR-A and ATR-B conformations but were placed in the position of ATR-B and ATR-A in the ATR-ATRIP complex, respectively. If two ATR monomers were to adopt same conformation (either A or B), the two ATR N-termini would together form conformations that are not suitable for ATRIP association (Supplementary information, Movie S2).
